# Supplementary material
Source: PubMed Central journal article supplement (PMC3955955)
Supplement: NIHMS517767-supplement-SI.pdf [file NIHMS517767-supplement-SI.pdf]

# **CHEMISTRY**

---

## **A EUROPEAN JOURNAL**

---

### Supporting Information

© Copyright Wiley-VCH Verlag GmbH & Co. KGaA, 69451 Weinheim, 2012

#### **Electronic Structure Analysis of the Oxygen-Activation Mechanism by Fe<sup>II</sup>- and $\alpha$ -Ketoglutarate ( $\alpha$ KG)-Dependent Dioxygenases**

**Shengfa Ye,<sup>[a]</sup> Christoph Riplinger,<sup>[a]</sup> Andreas Hansen,<sup>[a]</sup> Carsten  
Krebs,<sup>[b]</sup> J. Martin Bollinger, Jr.,<sup>[b]</sup> and Frank Neese\*<sup>[a]</sup>**

chem\_201102829\_sm\_miscellaneous\_information.pdf

## Geometric and electronic structures of O<sub>2</sub> adducts

The molecular orbital diagram for the septet {FeO<sub>2</sub>}<sup>8</sup> species (Figure S1) displays that of five metal d-based MOs four are singly occupied, and one is doubly occupied. The last two spin-up SOMOs are essentially O<sub>2</sub> π\*-orbitals. By inspection, the bonding MO referred to as Fe-d<sub>xz</sub> in Figure 5 contains nearly equal contributions from the O<sub>2</sub>-π<sub>ip</sub>\* and the Fe-d<sub>xz</sub> fragment orbitals (60% Fe vs 34% O<sub>2</sub>), and so does its singly occupied antibonding partner denoted as O<sub>2</sub>-π<sub>ip</sub>\*. Therefore, the bonding pattern is best rationalized by two resonance electronic structures, both of which are BS(6,0) solutions: a) a HS Fe<sup>II</sup> center (S<sub>Fe</sub> = 2) ferromagnetically coupled to a triplet O<sub>2</sub> (S<sub>O2</sub> = 1) and b) a HS Fe<sup>III</sup> ion (S<sub>Fe</sub> = 5/2) bound to an O<sub>2</sub><sup>-•</sup> radical ligand with S<sub>O2</sub> = 1/2 in a ferromagnetic fashion. Relative to the resting state, it becomes evident that the bound O<sub>2</sub> group is partially reduced upon binding to the iron center. The calculated isomer shift for the septet {FeO<sub>2</sub>}<sup>8</sup> species is 0.83 mm/s, which is between typical values of HS Fe<sup>II</sup> and HS Fe<sup>III</sup>, supporting our interpretation that the electronic structure is best described by the above two resonance structures.

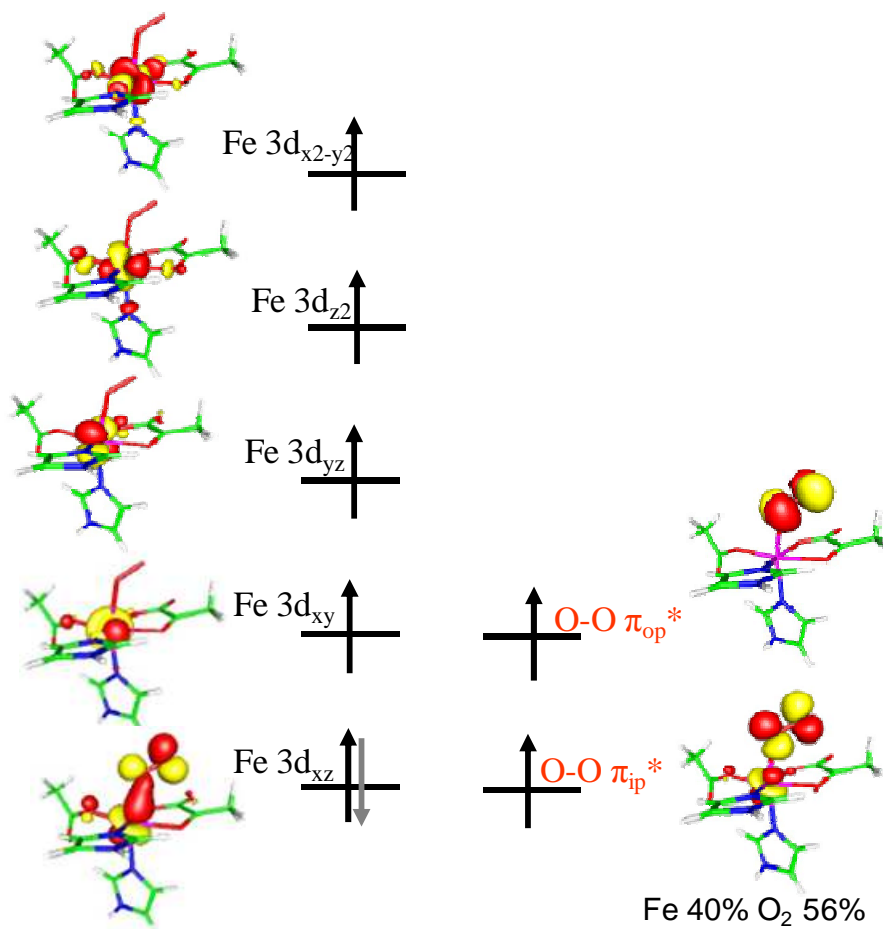

Figure S1. Schematic MO diagram for the septet  $\text{O}_2$  adduct, quasi-restricted orbitals were employed.

The electronic structure of the quintet  $\{\text{FeO}_2\}^8$  species may be best interpreted either as a HS ferric ion ( $S_{\text{Fe}} = 5/2$ ) antiferromagnetically coupled to a superoxo anion radical ( $S_{\text{O}_2} = 1/2$ ) referred to as a BS(5,1) solution; or as a HS  $\text{Fe}^{\text{II}}$  ( $S_{\text{Fe}} = 2$ ) center coordinated to a neutral  $^1\text{O}_2$  approached by a BS(4,0) calculation. Both initial guesses eventually converged to the same BS(5,1) state. As depicted in Figure S2, five SOMOs in the spin-up manifold have predominantly Fe-3d character. In the spin-down set one unpaired electron resides in the  $\pi_{\text{op}}^*$ -orbital of the  $\text{O}_2$ -fragment, thereby yielding an overall quintet state. The other  $\text{O}_2$   $\pi^*$ -orbital is doubly occupied. Thus, the bonding situation defines a

HS Fe<sup>III</sup> center ( $S_{\text{Fe}} = 5/2$ ) that is antiferromagnetically coupled to a  $^2\text{O}_2^{-\bullet}$  ( $S_{\text{O}_2} = 1/2$ )  $\pi$ -radical. Consistent with this description, the calculated Fe isomer shift of 0.56 mm/s is typical of HS Fe<sup>III</sup>. Inspection of the doubly occupied  $\text{O}_2 \pi_{\text{ip}}^*$ -orbital reveals that there is a weak bonding interaction between the uncoordinated O-atom in  $\text{O}_2$  and the C2 atom in  $\alpha\text{KG}$ . However, this weak bonding is absent in the corresponding septet species, which explains the shorter C-O distance in the quintet species relative to that in the septet analogue.

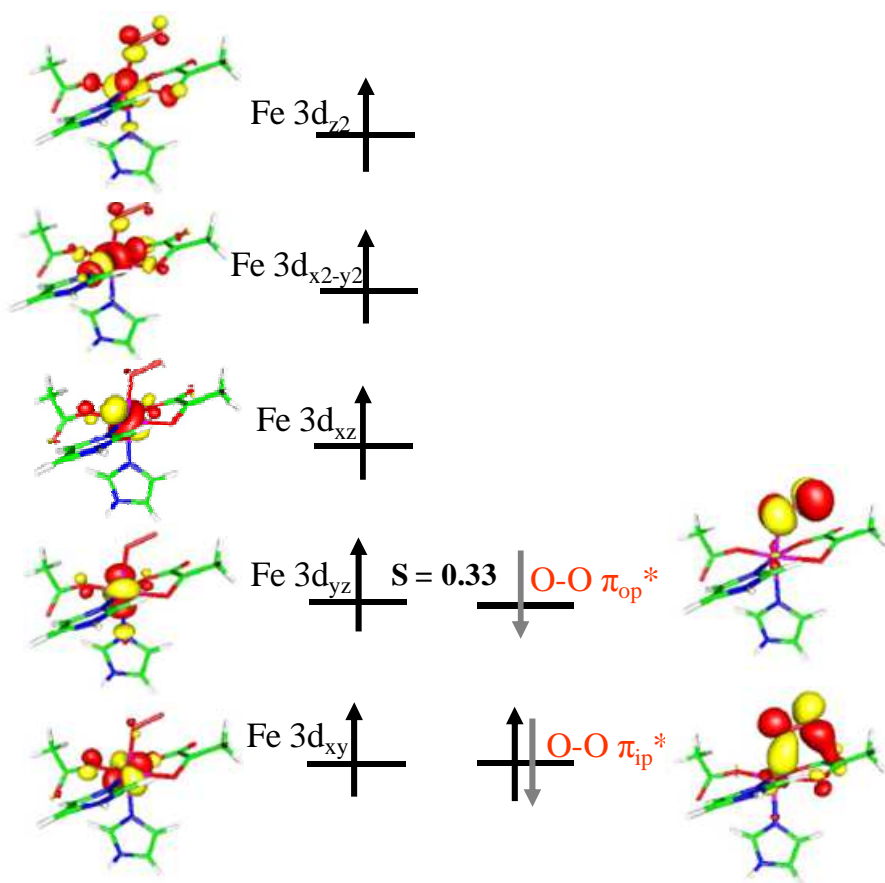

Figure S2. Schematic MO diagram for the quintet  $\text{O}_2$  adduct, the spin coupled pair represents unrestricted corresponding orbitals, whereas for the remaining orbitals quasi-restricted orbitals were employed.

The electronic structure of the triplet  $\{\text{FeO}_2\}^8$  species was calculated using the three different initial guesses, namely, BS(2,0), BS(3,1) and BS(4,2). The BS(2,0) solution may be used to describe an intermediate-spin (IS)  $\text{Fe}^{\text{II}}$  ion ( $S_{\text{Fe}} = 1$ ) bound to a singlet  $\text{O}_2$  ligand with  $S_{\text{O}_2} = 0$  or a low-spin (LS) ferrous center ( $S_{\text{Fe}} = 0$ ) coordinated to a triplet  $\text{O}_2$  ligand with  $S_{\text{O}_2} = 1$ . The BS(3,1) state is thought to correspond to antiferromagnetic coupling between an IS ferric center ( $S_{\text{Fe}} = 3/2$ ) and an  $\text{O}_2^{\bullet}$  radical ligand ( $S_{\text{O}_2} = 1/2$ ). By contrast, a HS  $\text{Fe}^{\text{II}}$  ion ( $S_{\text{Fe}} = 2$ ) that is antiferromagnetically coupled to a ground state  $\text{O}_2$  ligand ( $S_{\text{O}_2} = 1$ ) is approached by the BS(4,2) calculation. However, the calculations with the guesses BS(2,0) and BS(3,1) always converged to the same BS(4,2) solution. A molecular orbital diagram obtained from the optimized structure of the triplet  $\{\text{FeO}_2\}^8$  species is presented in Figure 7. In the upper valence region one can identify one doubly occupied and four singly occupied metal-based 3d orbitals in the spin-up set and two singly occupied  $\text{O}_2$   $\pi^*$ -orbitals in the spin-down manifold. Two pathways of spin coupling are evident: a  $\pi$ -pathway involving the Fe  $d_{yz}$ - and the  $\text{O}_2$   $\pi_{\text{op}}^*$ -orbitals and a  $\sigma$ -pathway consisting of the Fe  $d_{z^2}$ - and  $\text{O}_2$   $\pi_{\text{ip}}^*$ -orbitals. As anticipated, this orbital occupation pattern is best rationalized by a HS ferrous center ( $S_{\text{Fe}} = 2$ ) interacting with a neutral triplet  $\text{O}_2$  ligand ( $S_{\text{O}_2} = 1$ ) in an antiferromagnetic manner. Accordingly, the calculated Fe isomer shift of 1.02 mm/s is typical of HS  $\text{Fe}^{\text{II}}$ .

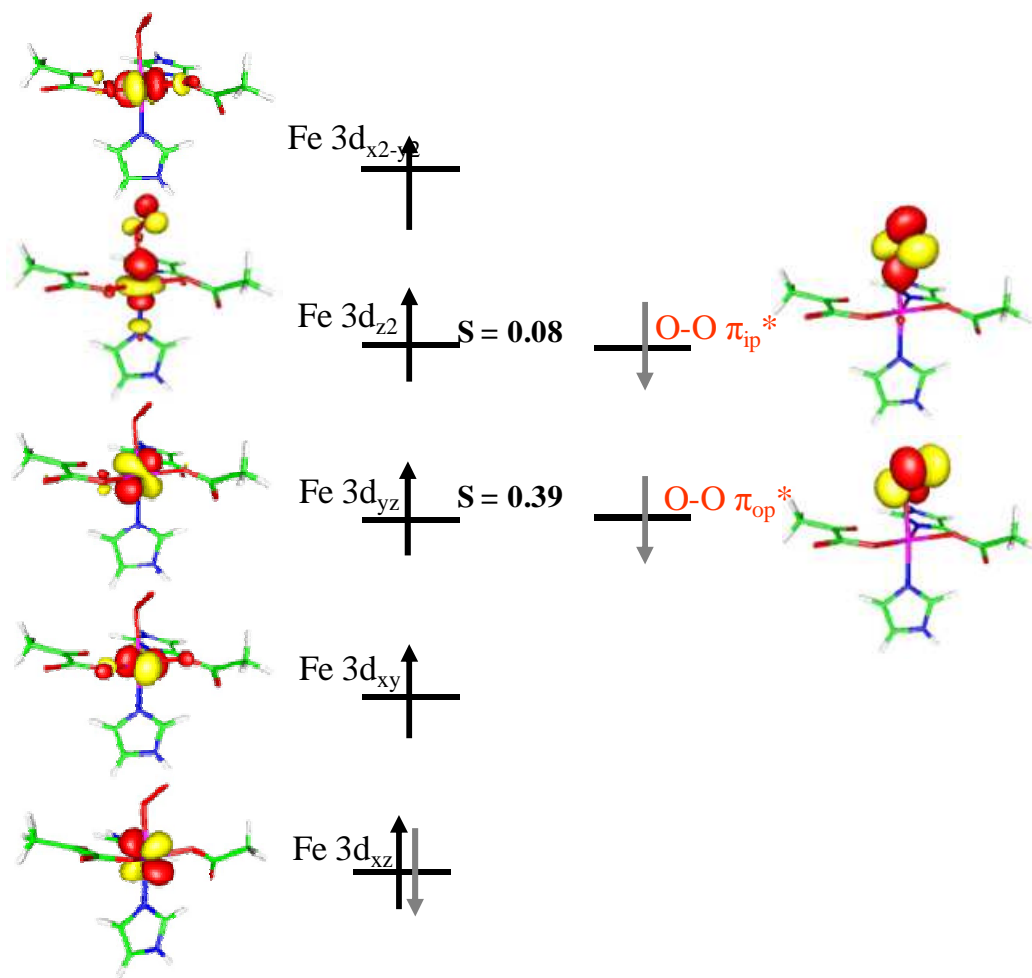

Figure S3. Schematic MO diagram for the triplet  $\text{O}_2$  adduct, the spin coupled pair represents unrestricted corresponding orbitals, whereas for the remaining orbitals quasi-restricted orbitals were employed.

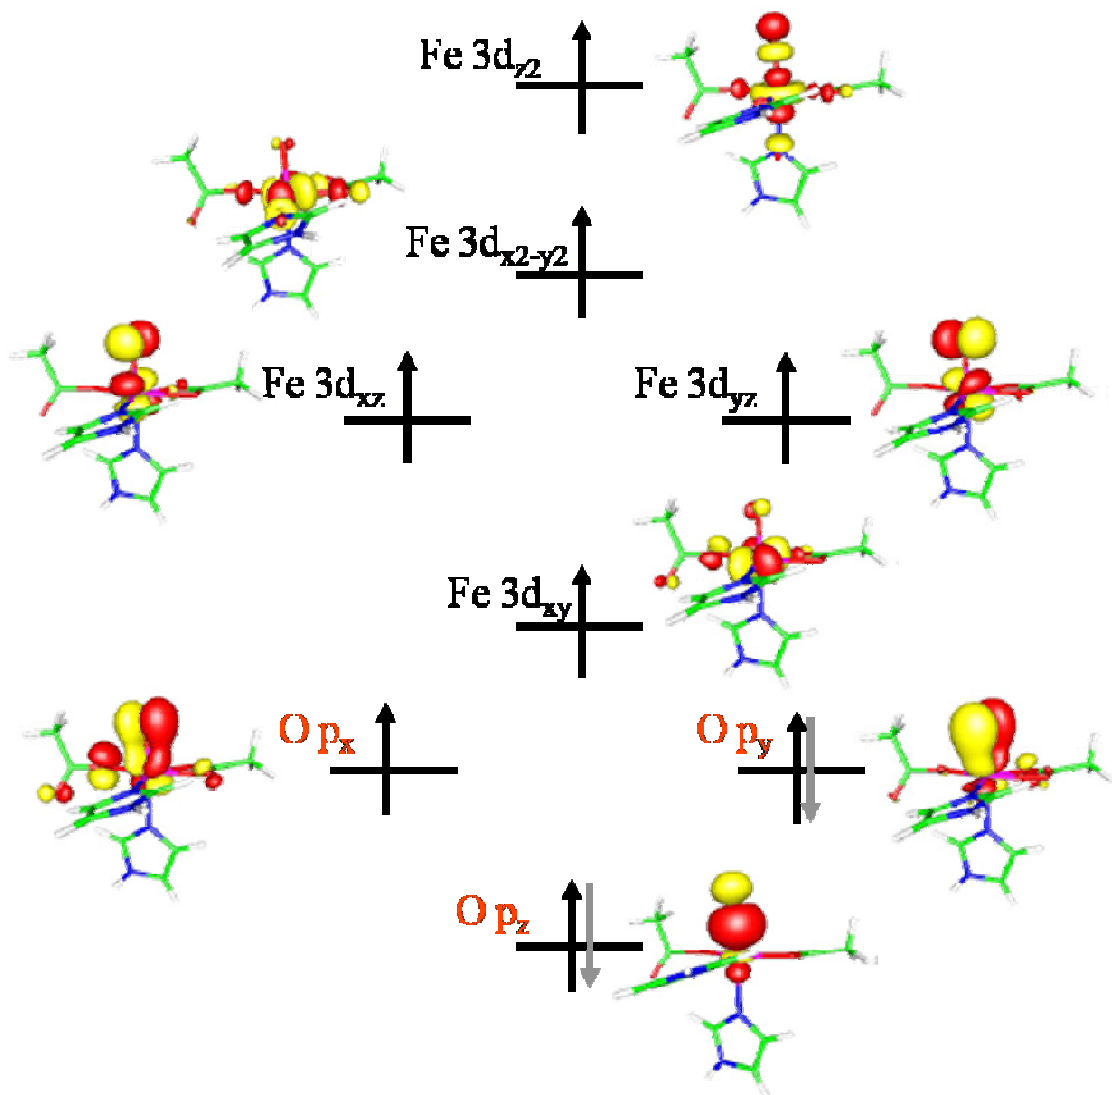

Figure S4. Schematic MO diagram for the septet  $\text{Fe}^{\text{III}}$ -oxyl species, quasi-restricted orbitals were employed.

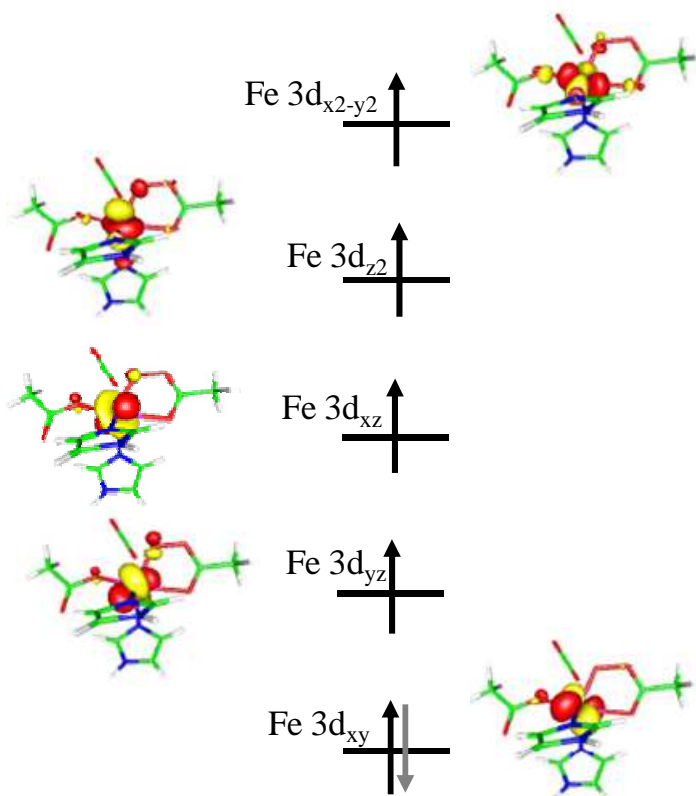

Figure S5. Schematic MO diagram for the peroxo-succinate ferrous complex, quasi-restricted orbitals were employed.



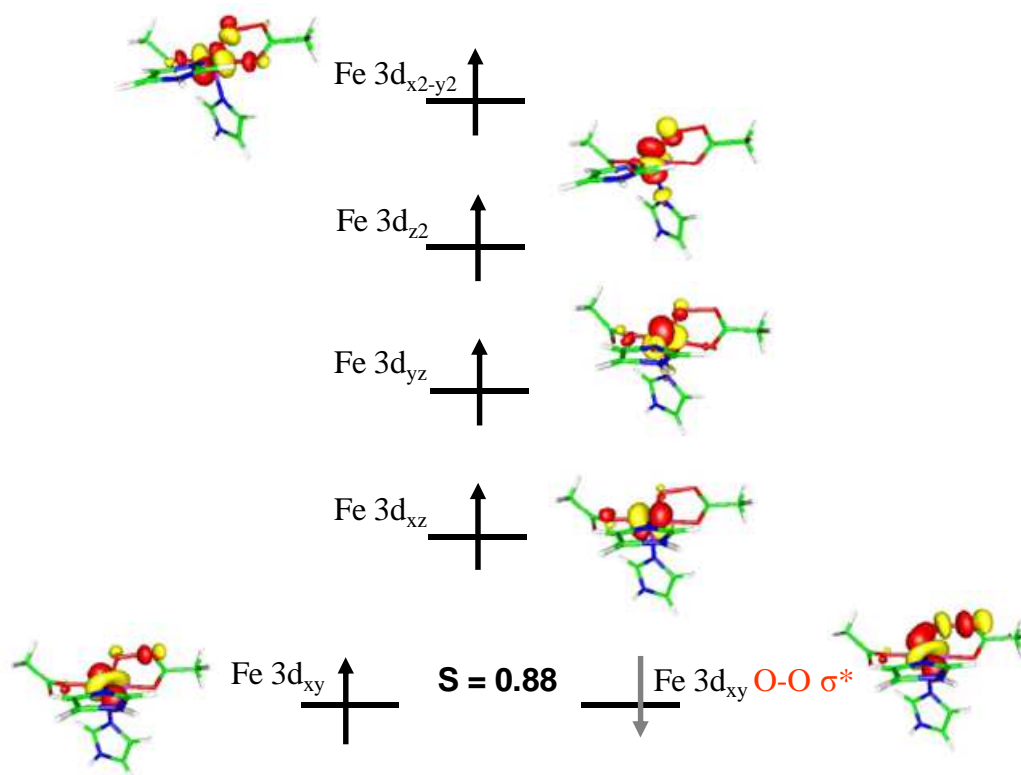

Figure S6. Schematic MO diagram for  $^5\text{TS2}$ , the spin coupled pair represents unrestricted corresponding orbitals, whereas for the remaining orbitals quasi-restricted orbitals were employed.

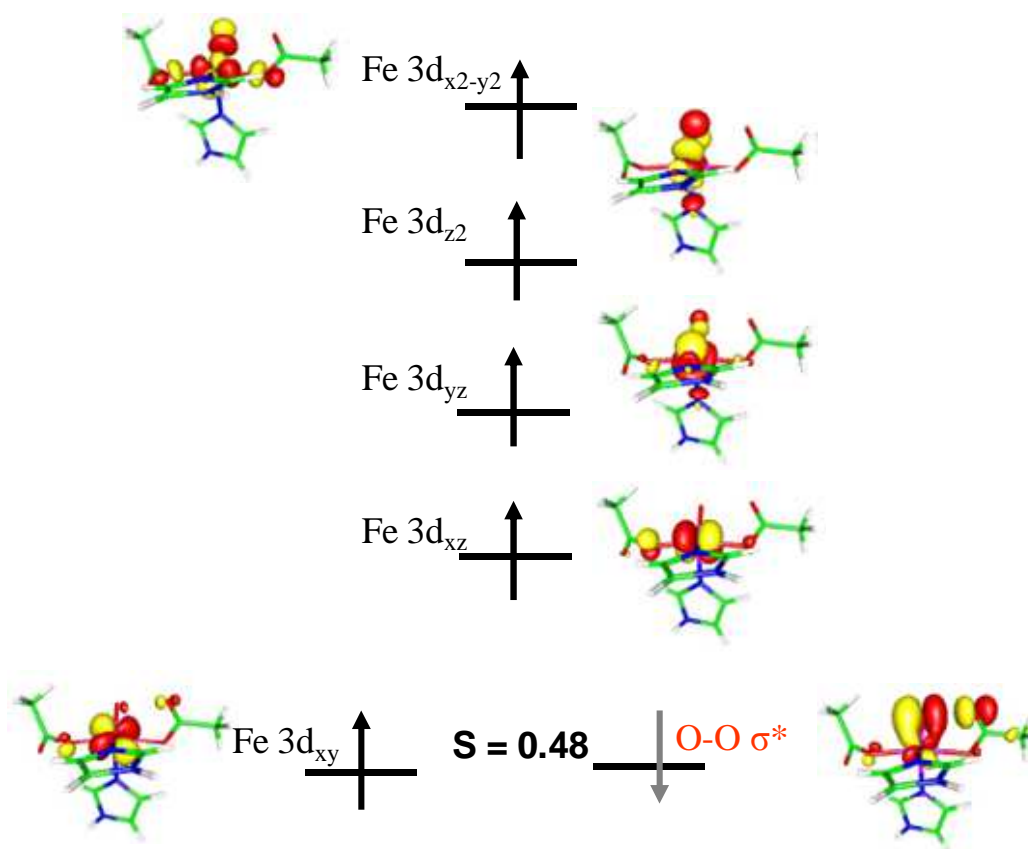

Figure S7. Schematic MO diagram for the half-bond intermediate, the spin coupled pair represents unrestricted corresponding orbitals, whereas for the remaining orbitals quasi-restricted orbitals were employed.

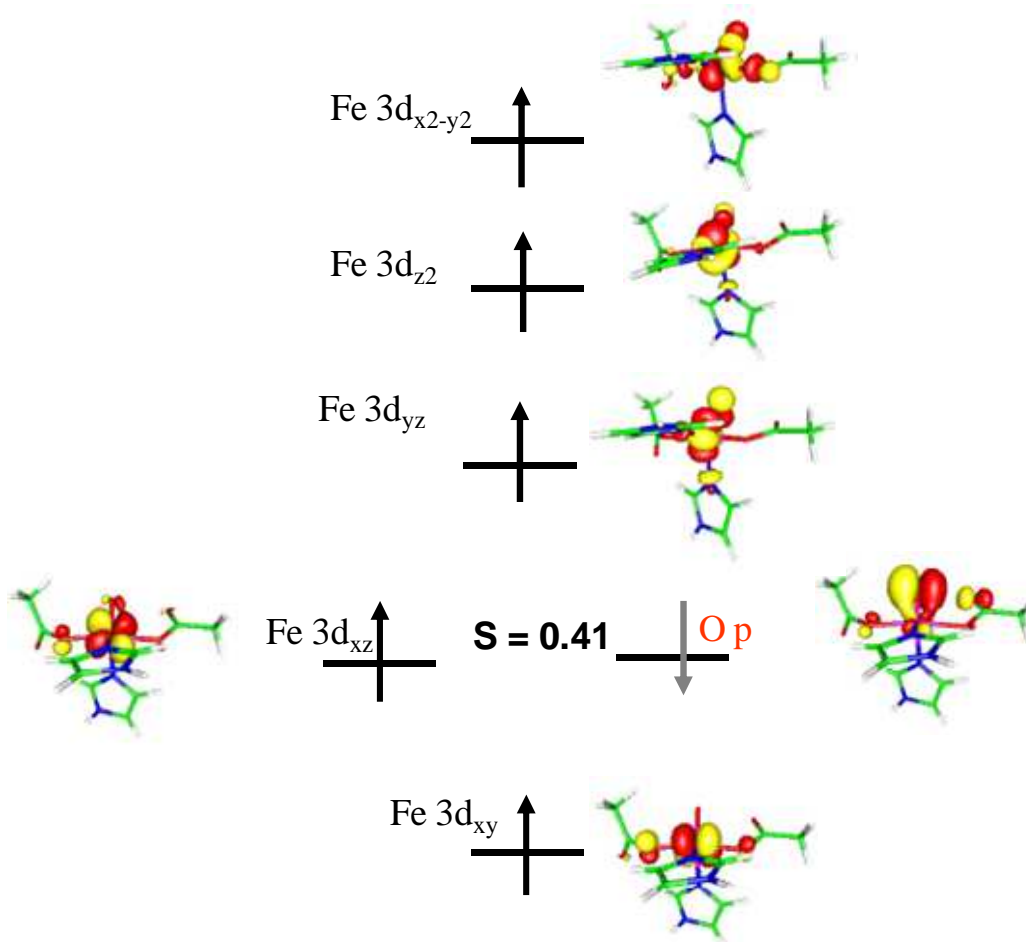

Figure S8. Schematic MO diagram for  ${}^5\text{TS3}$ , the spin coupled pair represents unrestricted corresponding orbitals, whereas for the remaining orbitals quasi-restricted orbitals were employed.

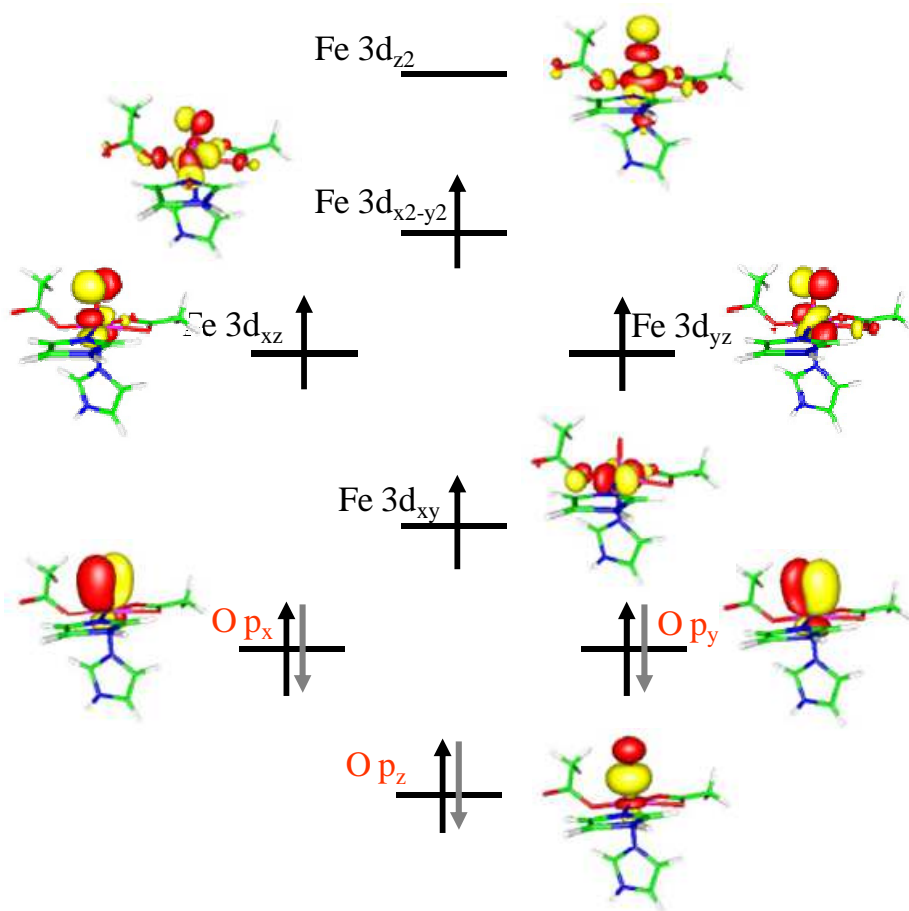

Figure S9. Schematic MO diagram for the quintet Fe<sup>IV</sup>-oxo complex, quasi-restricted orbitals were employed.
